# Supplementary material for: Controllable supramolecular self-assemblies (rods–wires–spheres) and ICT/PET based perylene probes for palladium detection in solution and the solid state
Source: Royal Society of Chemistry journal article supplement (doi:10.1039/c7nj03751a), 2017-12-05
Supplement: c7nj03751a1.pdf [file c7nj03751a1.pdf]

# Controllable supramolecular self-assemblies (rods-wires-spheres) and ICT/PET based perylene probe for palladium detection in solution and solid state

Kapil Kumar<sup>a</sup>, Gaurav Bhargava<sup>b</sup>, Subodh Kumar<sup>a</sup> and Prabhpreet Singh<sup>a\*</sup>

<sup>a</sup>Department of Chemistry, UGC Centre for Advanced Studies, Guru Nanak Dev University, Amritsar 143 005, India

email: [prabhpreet.chem@gndu.ac.in](mailto:prabhpreet.chem@gndu.ac.in); Tel: +91-84271-01534

<sup>b</sup>Department of Chemical Sciences, IKG Punjab Technical University, Kapurthala-144601, Punjab, India

## EXPERIMENTAL

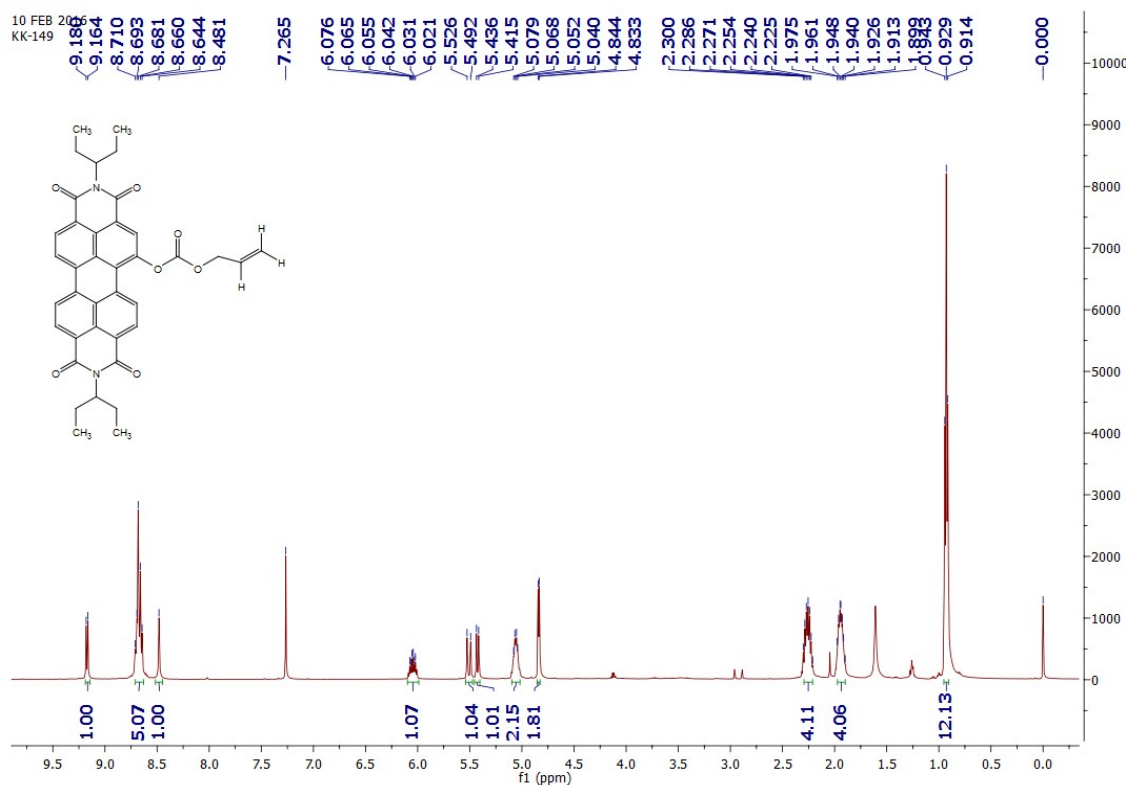

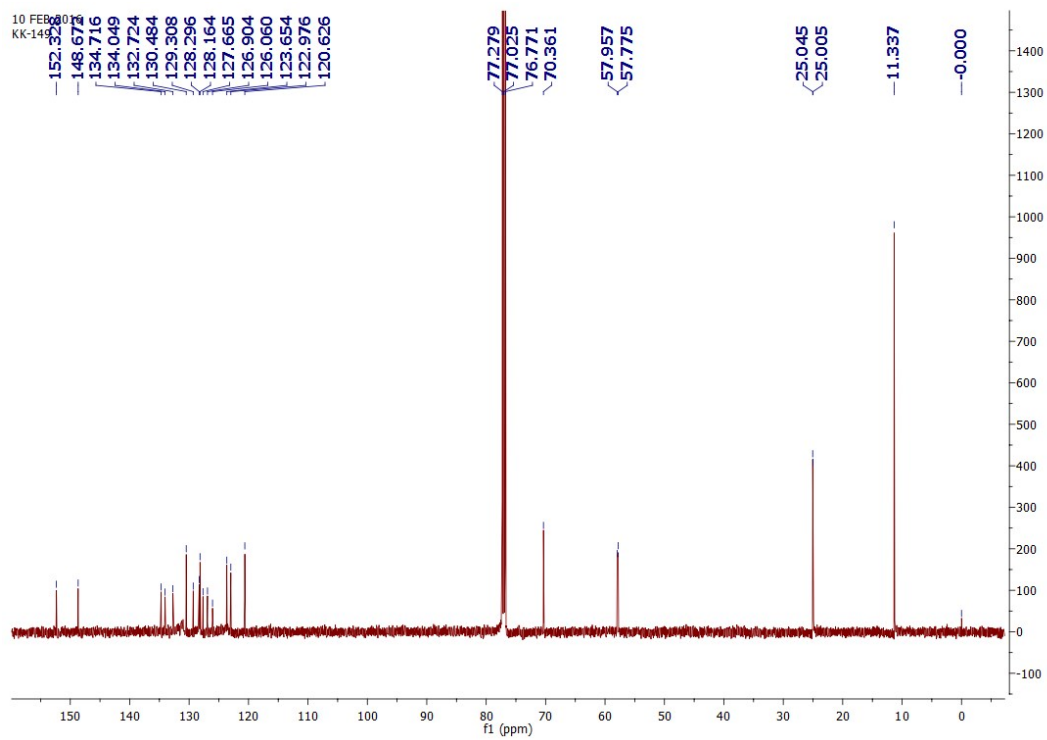

**Figure S1a:**  $^1\text{H}$  NMR and  $^{13}\text{C}$  Spectrum of AC-PDI.

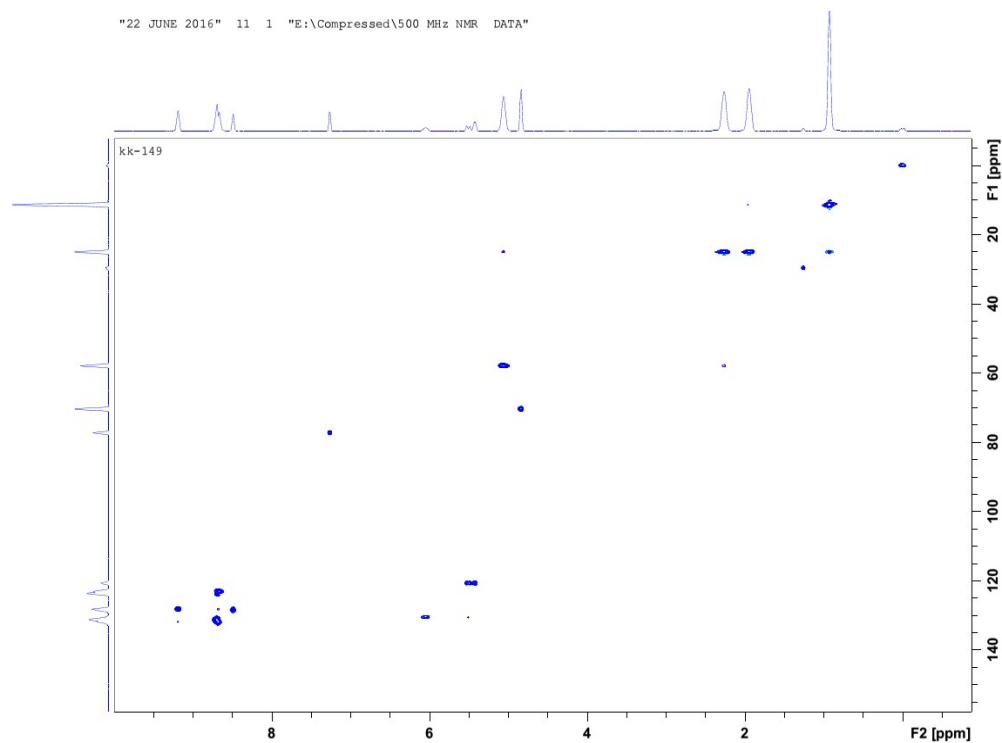

**Figure S1b:** HSQC spectrum of AC-PDI.

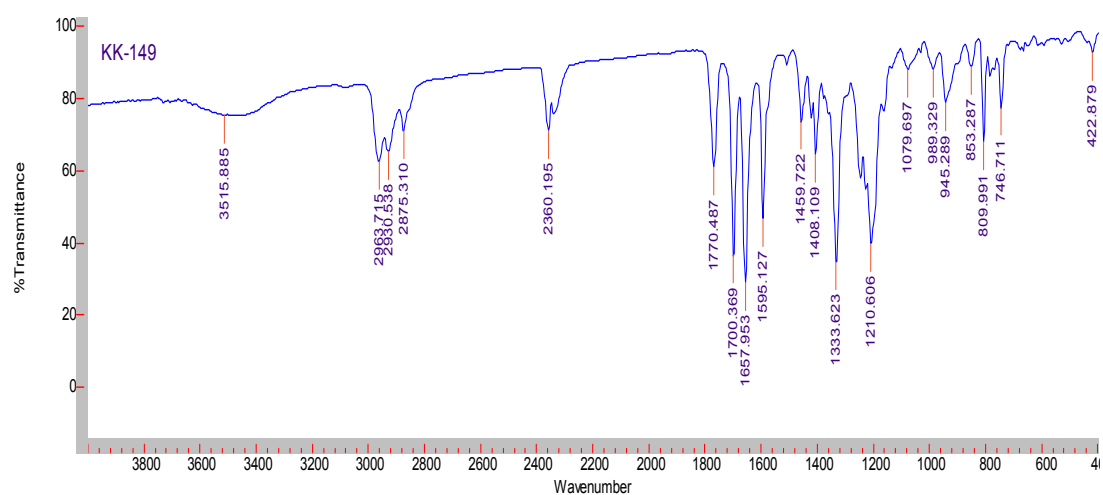

**Figure S1c:** IR spectrum of AC-PDI.

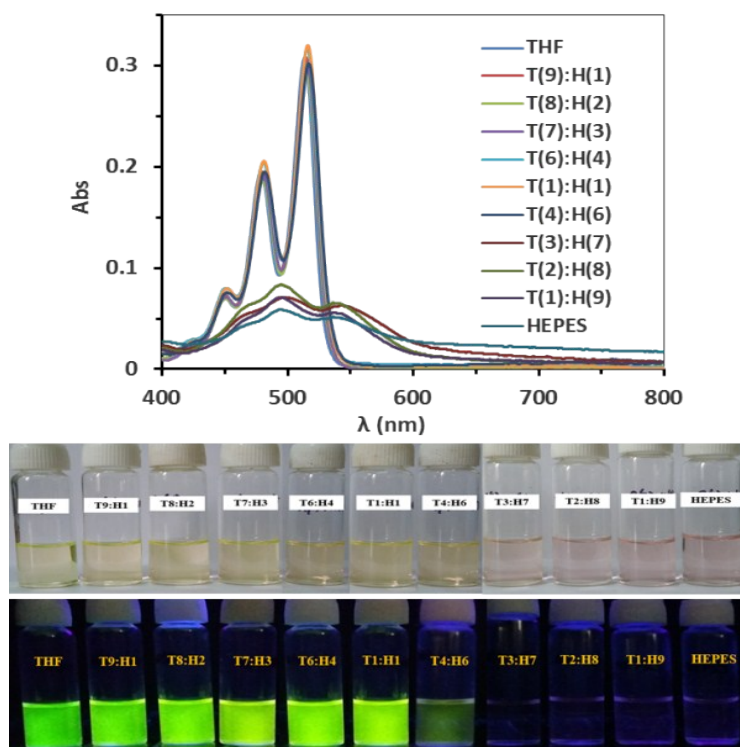

**Figure S2** UV-Vis absorption spectra of AC-PDI (10 μM) on gradual addition of H<sub>2</sub>O in THF (top); room light and after 365 nm UV irradiation photographs showing the visible colour and emission changes of AC-PDI in aqueous THF mixture (bottom); T = THF; D = DMF; H = H<sub>2</sub>O in v/v ratio.

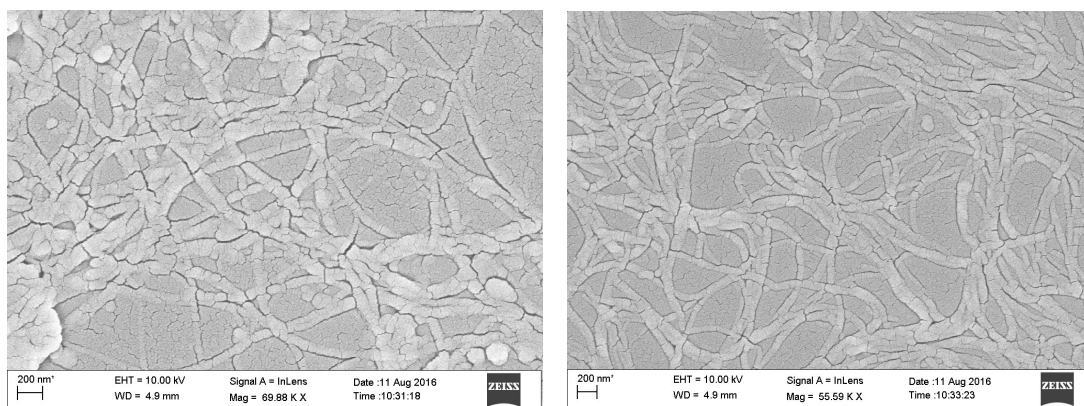

**Figure S3** SEM micrographs of self-assembled regular nanorods/tube of AC-PDI (10 μM) in methylcyclohexane.

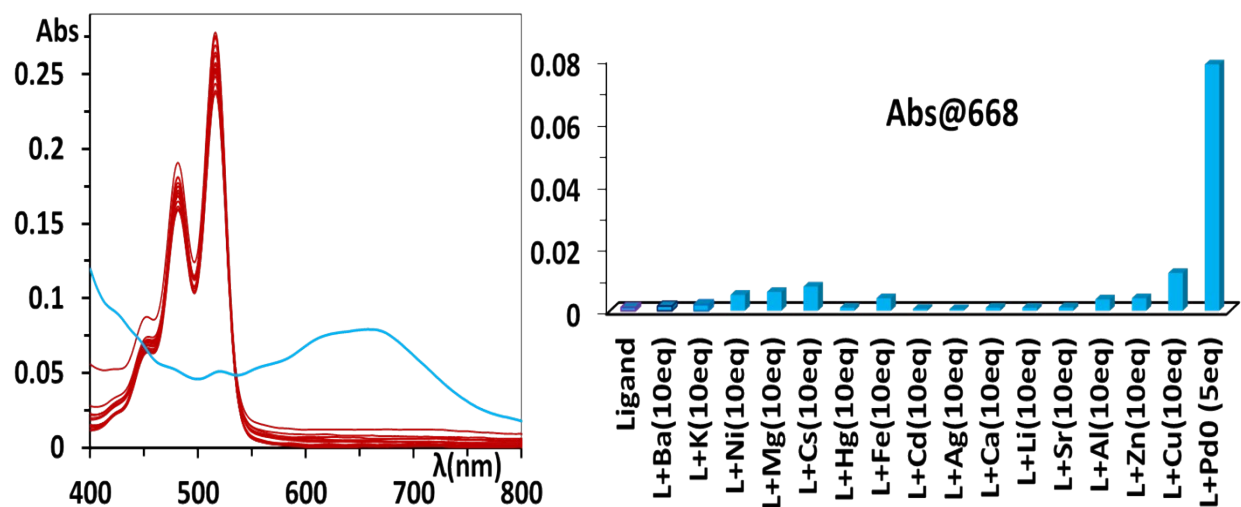

**Figure S4a** UV-Vis absorption spectrum and (b) bar diagram showing the effect of individual metal ions on the absorption spectra of ACF-PDI

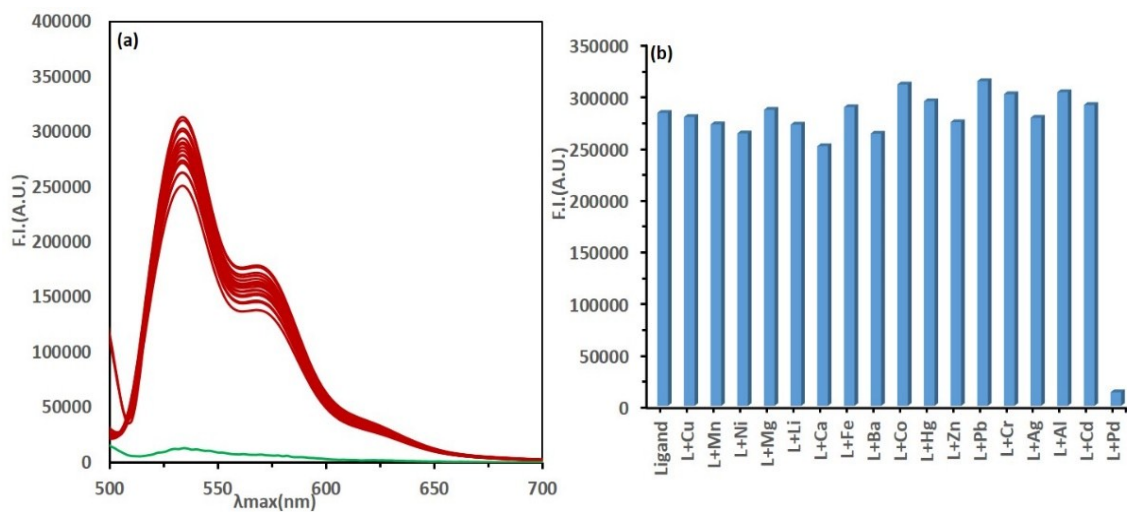

**Figure S4b** Emission spectra of AC-PDI and bar diagram indicating the effect of Pd<sup>0</sup> and other metal ions ( $\lambda_{\text{ex}} = 490$  nm; Ex = 1:1 nm, Em = 0.5:0.5 nm).

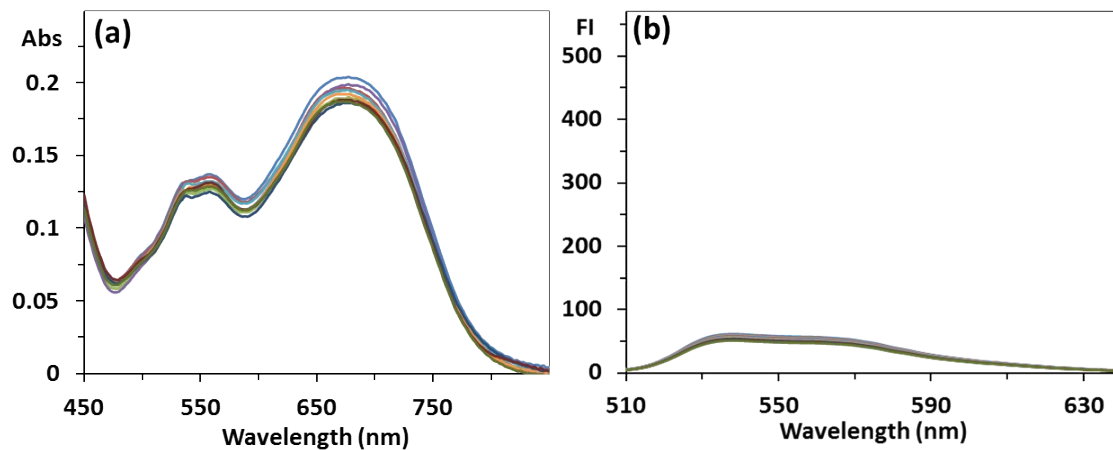

**Figure S5** (a) UV-Vis and (b) Fluorescence spectra of **PDI 1** (10 μM) on incremental addition of Pd<sup>0</sup> in HEPES buffer-CH<sub>3</sub>CN (1:1, v/v, pH 7.2).

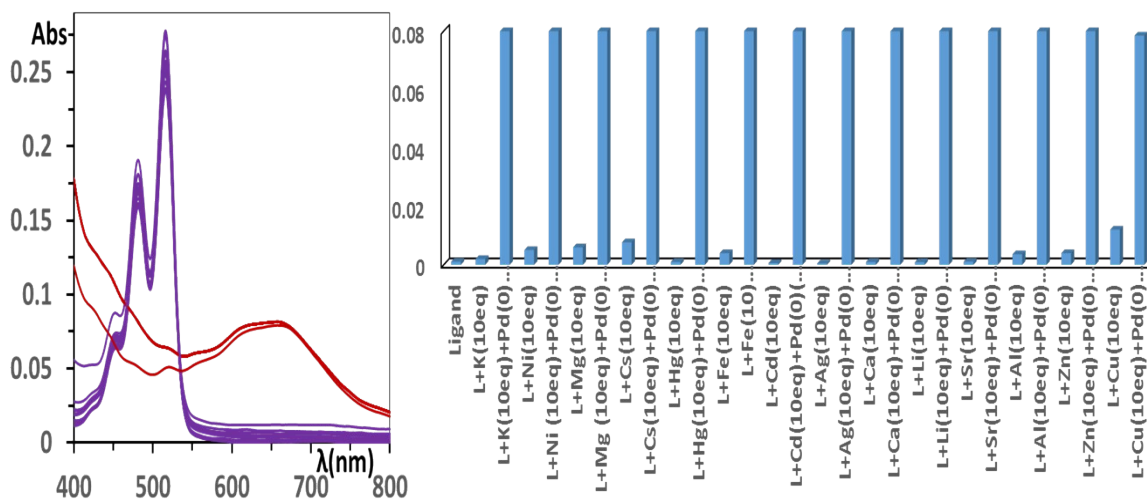

**Figure S6a** (a) UV-Vis absorption spectra and (b) bar diagram showing the effect of individual metal ions (100 μM) on the absorption spectra of **AC-PDI**.

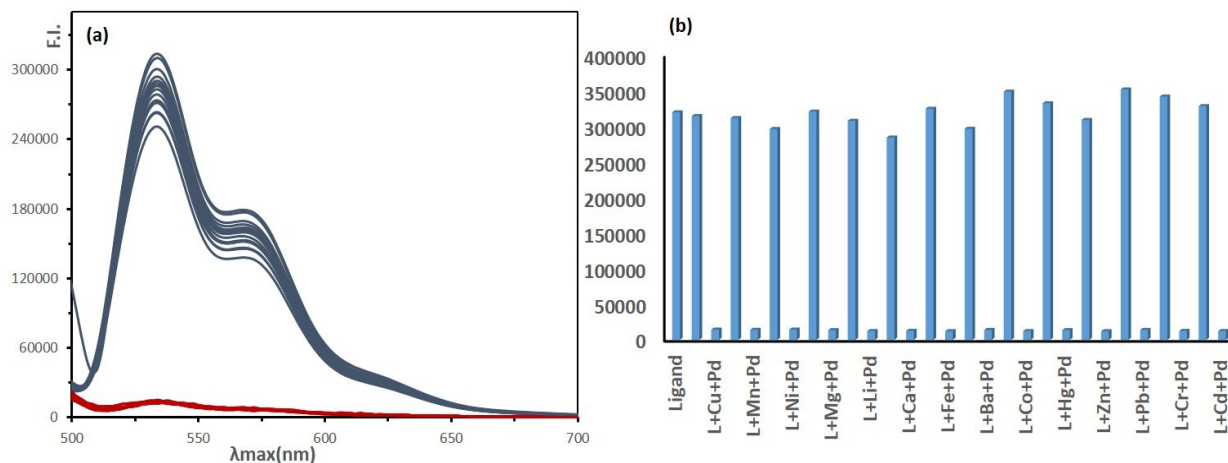

**Figure S6b** (a) Emission spectra and (b) bar graph of AC-PDI representing the response towards  $\text{Pd}^0$  in the presence of other metal ions ( $\lambda_{\text{ex}} = 490 \text{ nm}$ ; Slit width;  $\text{Ex} = 1:1 \text{ nm}$ ,  $\text{Em} = 0.5:0.5 \text{ nm}$ )

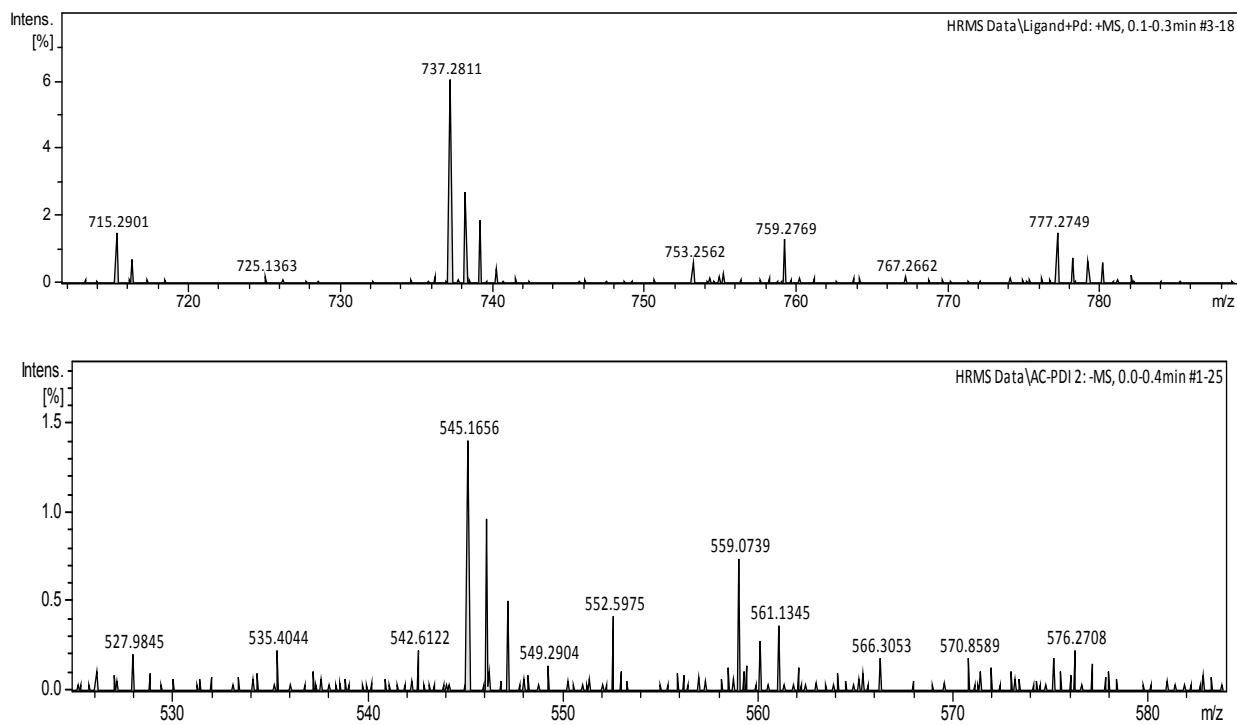

**Figure S7** HRMS spectrum of AC-PDI +  $\text{Pd}^0$  in positive and negative mode.

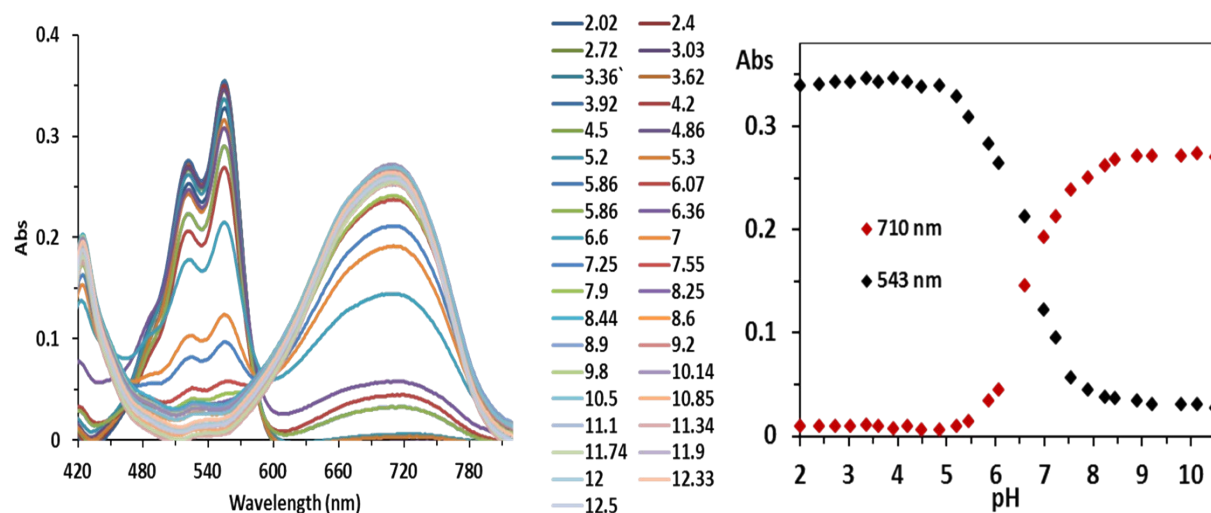

**Figure S8.** (Left) Effect of pH changes on the UV-Vis absorption spectrum of **PDI-OH** (10  $\mu\text{M}$ ) in water (50% THF); (Right) Plot of absorbance at 543 nm and 710 nm vs. change in pH of the solution.

**Table S1:** Time dependent and concentration dependent absorbance data of **AC-PDI** (10  $\mu\text{M}$ ) on addition of  $\text{Pd}^0$  in (a) HEPES buffer-THF (1:1, v/v, pH 7.2); (b) HEPES buffer-DMSO (3:7, v/v, pH 7.2).

| Conc. of $\text{Pd}^0$ | Time taken | 50% $\text{H}_2\text{O}:\text{CH}_3\text{CN}$ |                                            | Conc. of $\text{Pd}^0$ | Time taken | 30% $\text{H}_2\text{O}:\text{DMSO}$      |                                            |
|------------------------|------------|-----------------------------------------------|--------------------------------------------|------------------------|------------|-------------------------------------------|--------------------------------------------|
|                        |            | Rate constant $K_1$                           | Rate constant $K_2$                        |                        |            | Rate constant $K_1$                       | Rate constant $K_2$                        |
| 45 $\mu\text{M}$       | 26 min     | 0.25 $\text{min}^{-1}$<br>(up to 0-4 min)     | 0.07 $\text{min}^{-1}$<br>(up to 4-18 min) | 35 $\mu\text{M}$       | 20 min     | 0.23 $\text{min}^{-1}$<br>(up to 0-8 min) | 0.08 $\text{min}^{-1}$<br>(up to 8-20 min) |
| 90 $\mu\text{M}$       | 18 min     | 0.30 $\text{min}^{-1}$<br>(up to 0-4 min)     | 0.07 $\text{min}^{-1}$<br>(up to 4-16 min) | 70 $\mu\text{M}$       | 12 min     | 0.36 $\text{min}^{-1}$<br>(up to 0-4 min) | 0.10 $\text{min}^{-1}$<br>(up to 4-12 min) |
| 135 $\mu\text{M}$      | 16 min     | 0.22 $\text{min}^{-1}$ (up to 0-6 min)        | 0.08 $\text{min}^{-1}$ (up to 6-14 min)    | 105 $\mu\text{M}$      | 12 min     | 0.48 $\text{min}^{-1}$<br>(up to 0-4 min) | 0.12 $\text{min}^{-1}$<br>(up to 4-12 min) |
